# Supplementary material for: Green Synthesis of Blumea balsamifera Oil Nanoemulsions Stabilized by Natural Emulsifiers and Its Effect on Wound Healing
Source: MDPI journal article supplement (doi:10.3390/molecules29091994), 2024-04-26
Supplement: s1 [file s1]

# Green synthesis of *Blumea balsamifera* oil nanoemulsions stabilized by natural emulsifiers and its effect on wound healing

Lingfeng Du<sup>1</sup>, Chunfang Ma<sup>1</sup>, Bingnan Liu<sup>1</sup>, Wei Liu<sup>1</sup>, Yue Zhu<sup>2,3</sup>, Zuhua

Wang<sup>2,3</sup>, Teng Chen<sup>2,3\*</sup>, Luqi Huang<sup>4\*</sup>, Yuxin Pang<sup>1,2,5\*</sup>

<sup>1</sup> College of Chinese Medicine Resources, Guangdong Pharmaceutical University, Yunfu 527325, China

<sup>2</sup> College of Pharmaceutical Sciences, Guizhou University of Traditional Chinese Medicine, Guiyang 550025, China;

<sup>3</sup> Nano-Drug Technology Research Center, Guizhou University of Traditional Chinese Medicine, Guiyang 550025, China

<sup>4</sup> China Academy of Chinese Medical Sciences, Beijing 100700, China

<sup>5</sup> Yunfu Traditional Chinese Medicine Resources and Germplasm Resources Database Management Center, Yunfu 527325, China

\*Correspondence: **Teng Chen**, chenteng0907@163.com; **Luqi Huang**,

huangluqi01@126.com; **Yuxin Pang**, pyxmarx@126.com

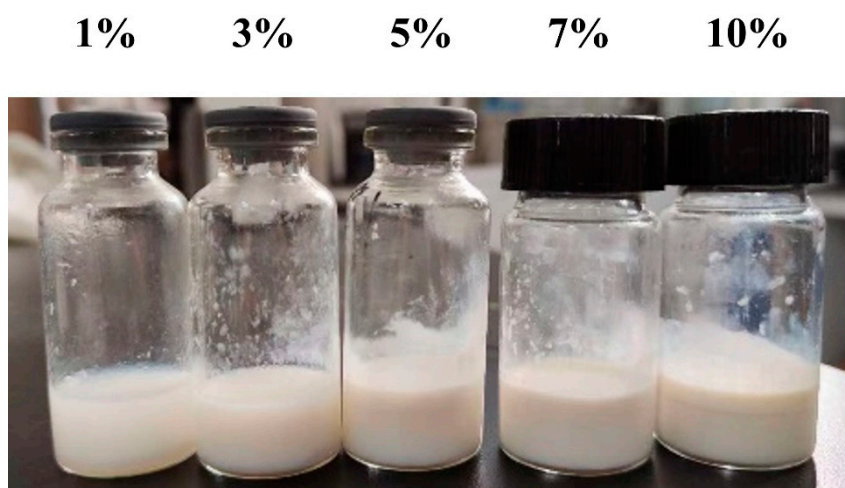

**Figure S1.** Effect of oil phase content on BBG-NEs.

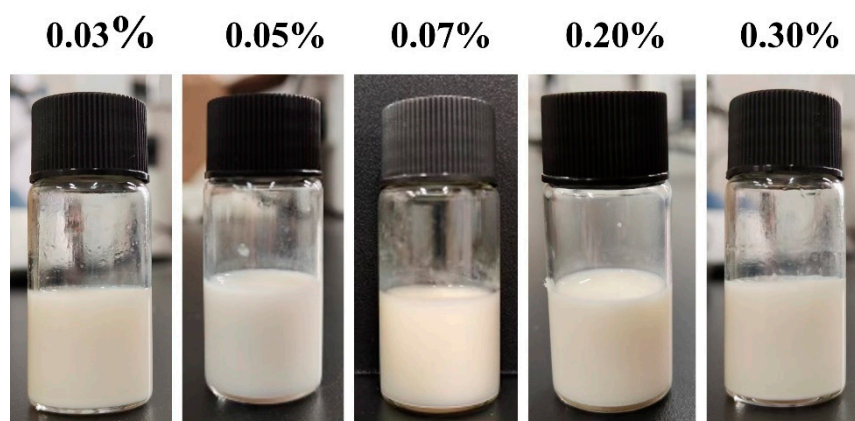

**Figure S2.** Effect of *Bletilla striata* polysaccharide content on BBG-NEs.

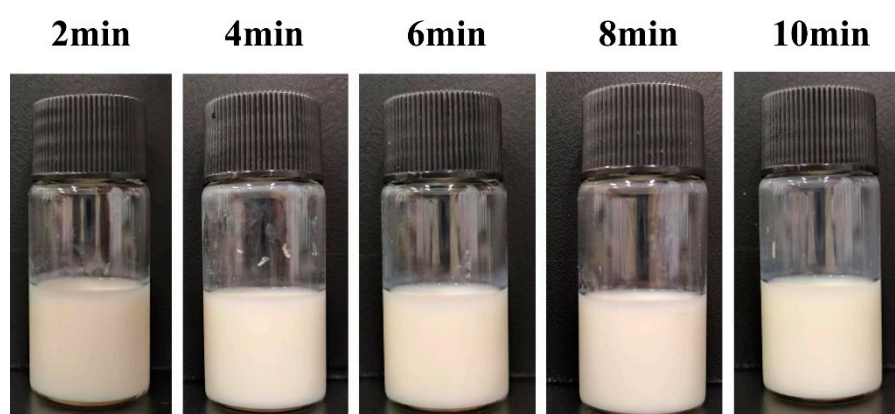

**Figure S3.** Effect of ultrasonic time on BBG-NEs.

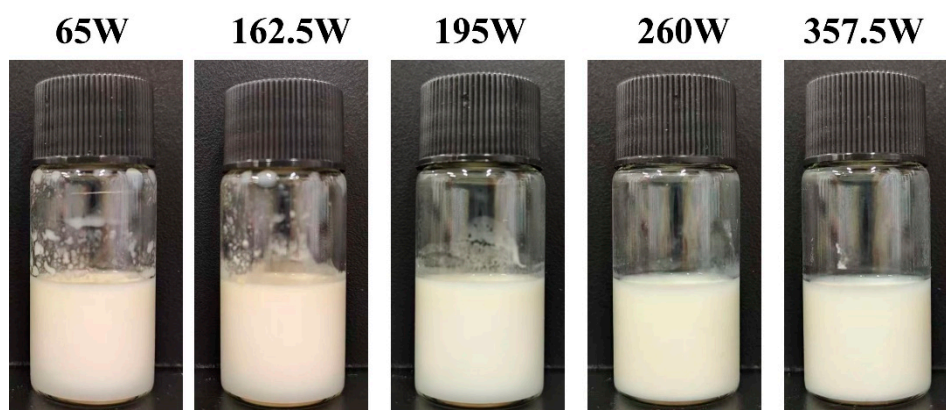

**Figure S4.** Effect of ultrasonic power on BBG-NEs.

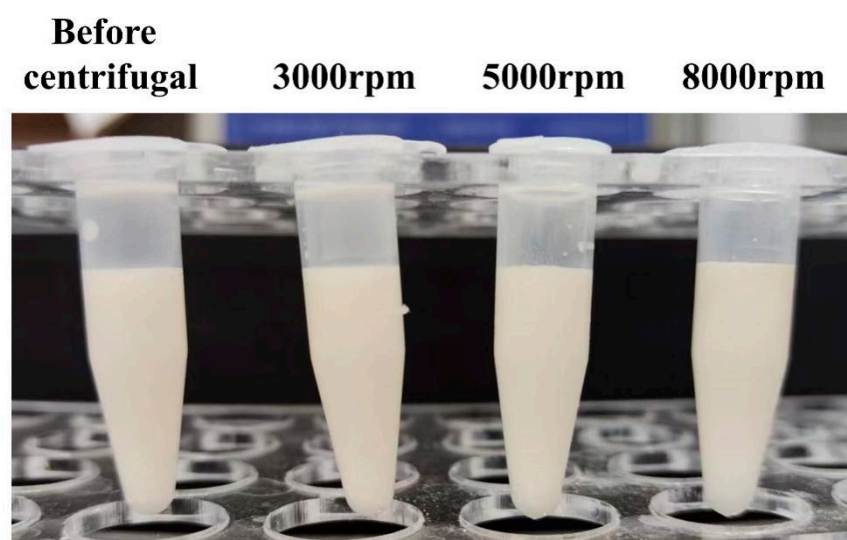

**Figure S5.** Centrifugal stability of BBG-NEs.

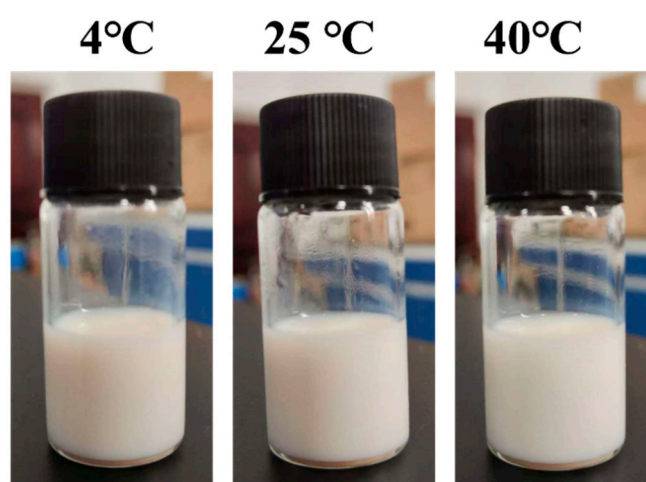

**Figure S6.** Temperature stability of BBG-NEs.



represent the larger the DEGREE value of the component.

**Table S1.** Particle size, PDI and potential of BBG-NEs prepared by ultrasonication with different BBO content.

| No. | Oil phase (BBO), w/w | Appearance                             | Zeta potential (mV) | Particle size(nm) | PDI         |
|-----|----------------------|----------------------------------------|---------------------|-------------------|-------------|
| 1   | 1%                   | Homogeneous milky white liquid, opaque | -25.48±1.69         | 222.2±7.06        | 0.243±0.013 |
| 2   | 3%                   | Homogeneous milky white liquid, opaque | -55.98±13.58        | 229.71±6.82       | 0.238±0.001 |
| 3   | 5%                   | Milky white liquid, layered            | — —                 | — —               | — —         |
| 4   | 7%                   | Milky white liquid, layered            | — —                 | — —               | — —         |
| 5   | 10%                  | Milky white liquid, layered            | — —                 | — —               | — —         |

**Table S2.** Particle size, PDI and potential of BBG-NEs prepared by ultrasonication with different content of BSP.

| No. | Emulsifier (BSP), w/w | Appearance                             | Zeta potential (mV) | Particle size(nm) | PDI         |
|-----|-----------------------|----------------------------------------|---------------------|-------------------|-------------|
| 1   | 0.03%                 | Homogeneous milky white liquid, opaque | -41.70±1.52         | 200.39±2.17       | 0.238±0.001 |
| 2   | 0.05%                 | Homogeneous milky white liquid, opaque | -30.17±0.72         | 213.95±5.89       | 0.238±0.002 |
| 3   | 0.07%                 | Homogeneous milky white liquid, opaque | -38.37±0.94         | 209.74±3.61       | 0.241±0.005 |
| 4   | 0.2%                  | Homogeneous milky white liquid, opaque | -48.28±10.35        | 221.59±2.22       | 0.268±0.039 |
| 5   | 0.3%                  | Homogeneous milky white liquid, opaque | -32.94±0.53         | 212.66±3.51       | 0.306±0.044 |



**Table S3.** Particle size, PDI and potential of BBG-NEs prepared by ultrasonication with different ultrasonic time.

| No. | Ultrasonic time, min | Appearance                             | Zeta potential | Particle size(nm) | PDI         |
|-----|----------------------|----------------------------------------|----------------|-------------------|-------------|
| 1   | 2min                 | Homogeneous milky white liquid, opaque | -38.37±0.94    | 209.74±3.61       | 0.241±0.005 |
| 2   | 4min                 | Homogeneous milky white liquid, opaque | -35.23±0.81    | 177.04±3.05       | 0.231±0.007 |
| 3   | 6min                 | Homogeneous milky white liquid, opaque | -32.86±0.71    | 170.2±2.39        | 0.212±0.008 |
| 4   | 8min                 | Homogeneous milky white liquid, opaque | -27.51±0.99    | 194.11±8.34       | 0.281±0.056 |
| 5   | 10min                | Homogeneous milky white liquid, opaque | -32.23±3.13    | 162.24±3.99       | 0.189±0.018 |

**Table S4.** Particle size, PDI and potential of BBG-NEs prepared by ultrasonication with different ultrasonic power.

| No. | Ultrasonic power , W | Appearance                                                               | Zeta potential | Particle size(nm) | PDI         |
|-----|----------------------|--------------------------------------------------------------------------|----------------|-------------------|-------------|
| 1   | 65                   | Homogeneous milky white liquid, opaque, with oil droplets on the surface | -22.18±0.57    | 268.06±6.95       | — —         |
| 2   | 162.5                | Homogeneous milky white liquid, opaque                                   | -32.86±0.71    | 170.2±2.39        | 0.212±0.008 |
| 3   | 195                  | Homogeneous milky white liquid, opaque                                   | -34.63±1.63    | 177.85±5.96       | 0.209±0.015 |
| 4   | 260                  | Homogeneous milky white liquid, opaque                                   | -32.22±1.99    | 173±2.97          | 0.214±0.012 |
| 5   | 357.5                | Homogeneous milky white liquid, opaque                                   | -29.69±2.05    | 143.16±3.463      | 0.207±0.036 |

**Table S5.** Parameters of genes associated with BBG-NEs for wound healing (top 5).

| Protein names                                         | Gene names | Betweenness unDir | Closeness unDir | Degree unDir |
|-------------------------------------------------------|------------|-------------------|-----------------|--------------|
| Serine/Threonine Kinase 1                             | AKT1       | 601.5349403       | 0.005617978     | 98           |
| C-X-C Motif Chemokine Ligand 8                        | CXCL8      | 529.9941482       | 0.004901961     | 73           |
| Epidermal Growth Factor Receptor                      | EGFR       | 206.7625745       | 0.005263158     | 86           |
| Hypoxia Inducible Factor 1 Subunit Alpha              | HIF1A      | 399.3425545       | 0.005154639     | 82           |
| Jun Proto-Oncogene, AP-1 Transcription Factor Subunit | JUN        | 262.9061061       | 0.005050505     | 78           |

**Table S6.** Compounds in the drug-ingredient-target network (top 5).

| Compound name                                                                | Molecular function                             | 2D structure                                                                        | Degree |
|------------------------------------------------------------------------------|------------------------------------------------|-------------------------------------------------------------------------------------|--------|
| Tetrahydrofuran-2-carboxylic acid                                            | C <sub>5</sub> H <sub>8</sub> O <sub>3</sub>   | 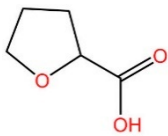 | 6      |
| 1,7,7-Trimethylbicyclo[2.2.1]heptan-2-yl-3-methylenecyclopentane-carboxylate | C <sub>17</sub> H <sub>26</sub> O <sub>2</sub> |  | 4      |
| Eugenol                                                                      | C <sub>10</sub> H <sub>12</sub> O <sub>2</sub> |  | 3      |

|                              |                                                |                                                                                    |   |
|------------------------------|------------------------------------------------|------------------------------------------------------------------------------------|---|
| 4-Methoxy-3-tert-butylphenol | C <sub>11</sub> H <sub>16</sub> O <sub>2</sub> | 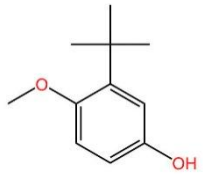  | 3 |
| Geranyl acetone              | C <sub>13</sub> H <sub>22</sub> O              |  | 3 |
| L-borneol                    | C <sub>10</sub> H <sub>18</sub> O              |   | / |

**Table S7.** The molecular docking results (top 5).

| Protein                                                                      | AKT   | CXCL8 | EGFR  | HIF1A | JUN   |
|------------------------------------------------------------------------------|-------|-------|-------|-------|-------|
| Affinity kcal/mol                                                            | (PDB  | (PDB  | (PDB  | (PDB  | (PDB  |
| Compound                                                                     | code  | code  | code  | code  | code  |
|                                                                              | 5YVN) | 6N2U) | 8A27) | 8HE3) | 7NYO) |
| 1,7,7-trimethylbicyclo[2.2.1]heptan-2-yl-3-methylenecyclopentane-carboxylate | -5.42 | -5.20 | -5.11 | -3.83 | -4.35 |
| Tetrahydrofuran-2-carboxylic acid                                            | -4.12 | -3.80 | -3.5  | -3.23 | -2.41 |
| Eugenol                                                                      | -3.61 | -4.26 | -4.35 | -2.45 | -2.19 |
| 4-Methoxy-3-tert-butylphenol                                                 | -3.86 | -4.07 | -3.41 | -3.07 | -2.62 |
| Geranyl acetone                                                              | -4.21 | -4.50 | -3.22 | -2.73 | -2.68 |
| L-borneol                                                                    | -5.14 | -5.11 | -5.29 | -4.2  | -3.7  |

**Table S8.** Nanoemulsion formulation with different BBO content.

| No. | Oil phase (BBO), w/w | Emulsifier (polysaccharide), w/w | Co-emulsifier (glycyrrhizic acid), w/w | Ultrasonic time, min | Ultrasonic power, W |
|-----|----------------------|----------------------------------|----------------------------------------|----------------------|---------------------|
| 1   | 1%                   | 1%                               | 0.3%                                   | 2                    | 162.5               |
| 2   | 3%                   | 1%                               | 0.3%                                   | 2                    | 162.5               |
| 3   | 5%                   | 1%                               | 0.3%                                   | 2                    | 162.5               |
| 4   | 7%                   | 1%                               | 0.3%                                   | 2                    | 162.5               |
| 5   | 10%                  | 1%                               | 0.3%                                   | 2                    | 162.5               |



**Table S9.** Nanoemulsion formulation with different content of BSP.

| No. | Oil phase<br>(BBO),<br>w/w | Emulsifier<br>(polysaccharide),<br>w/w | Co-emulsifier<br>(glycyrrhizic<br>acid), w/w | Ultrasonic<br>time, min | Ultrasonic<br>power, W |
|-----|----------------------------|----------------------------------------|----------------------------------------------|-------------------------|------------------------|
| 1   | 3%                         | 0.03%                                  | 0.3%                                         | 2                       | 162.5                  |
| 2   | 3%                         | 0.05%                                  | 0.3%                                         | 2                       | 162.5                  |
| 3   | 3%                         | 0.07%                                  | 0.3%                                         | 2                       | 162.5                  |
| 4   | 3%                         | 0.2%                                   | 0.3%                                         | 2                       | 162.5                  |
| 5   | 3%                         | 0.3%                                   | 0.3%                                         | 2                       | 162.5                  |

**Table S10.** Nanoemulsion formulation with different ultrasonic time.

| No. | Oil phase<br>(BBO),<br>w/w | Emulsifier<br>(polysaccharide),<br>w/w | Co-emulsifier<br>(glycyrrhizic<br>acid), w/w | Ultrasonic<br>time, min | Ultrasonic<br>power, W |
|-----|----------------------------|----------------------------------------|----------------------------------------------|-------------------------|------------------------|
| 1   | 3%                         | 0.07%                                  | 0.3%                                         | 2                       | 162.5                  |
| 2   | 3%                         | 0.07%                                  | 0.3%                                         | 4                       | 162.5                  |
| 3   | 3%                         | 0.07%                                  | 0.3%                                         | 6                       | 162.5                  |
| 4   | 3%                         | 0.07%                                  | 0.3%                                         | 8                       | 162.5                  |
| 5   | 3%                         | 0.07%                                  | 0.3%                                         | 10                      | 162.5                  |

**Table S11.** Nanoemulsion formulation with different ultrasonic power.

| No. | Oil phase<br>(BBO),<br>w/w | Emulsifier<br>(polysaccharide),<br>w/w | Co-emulsifier<br>(glycyrrhizic<br>acid), w/w | Ultrasonic<br>time, min | Ultrasonic<br>power, W |
|-----|----------------------------|----------------------------------------|----------------------------------------------|-------------------------|------------------------|
| 1   | 3%                         | 0.07%                                  | 0.3%                                         | 6                       | 65                     |
| 2   | 3%                         | 0.07%                                  | 0.3%                                         | 6                       | 162.5                  |
| 3   | 3%                         | 0.07%                                  | 0.3%                                         | 6                       | 195                    |
| 4   | 3%                         | 0.07%                                  | 0.3%                                         | 6                       | 260                    |
| 5   | 3%                         | 0.07%                                  | 0.3%                                         | 6                       | 357 . 5                |
